# Supplementary material for: Evaluation of Climate Change Resilience of Urban Road Network Strategies
Source: MDPI journal article supplement (doi:10.3390/infrastructures7110146), 2022-10-25
Supplement: s1 [file s1]

# Evaluation of Climate Change Resilience of Urban Road Network Strategies

Siama Begum, Rachel S. Fisher \*, Emma J. S. Ferranti and Andrew D. Quinn

## Reference List S1: List of policy documents gathered through systematic review

1. Birmingham City Council (2010) Birmingham 2026: Sustainable Community Strategy. Available at: [https://www.birmingham.gov.uk/downloads/file/1543/strat1\\_sustainable\\_community\\_strategy\\_birmingham\\_2026\\_2008](https://www.birmingham.gov.uk/downloads/file/1543/strat1_sustainable_community_strategy_birmingham_2026_2008) (Accessed: 3 March 2021).
2. Birmingham City Council (2013) Birmingham Mobility Action Plan: Green Paper. Available at: [https://www.birmingham.gov.uk/downloads/file/4210/bmap\\_green\\_paper\\_full\\_document](https://www.birmingham.gov.uk/downloads/file/4210/bmap_green_paper_full_document) (Accessed: 2 March 2021).
3. Birmingham City Council (2014) Birmingham Mobility Action Plan: White Paper. Available at: [https://www.birmingham.gov.uk/downloads/file/2082/exam92\\_birmingham\\_connected\\_birmingham\\_mobility\\_action\\_plan\\_white\\_paperpdf](https://www.birmingham.gov.uk/downloads/file/2082/exam92_birmingham_connected_birmingham_mobility_action_plan_white_paperpdf) (Accessed: 2 March 2021).
4. Birmingham City Council (2014) Birmingham Development Plan 2031: Infrastructure Delivery Plan. Available at: [https://www.birmingham.gov.uk/downloads/file/1412/cil\\_s06\\_infrastructure\\_delivery\\_plan](https://www.birmingham.gov.uk/downloads/file/1412/cil_s06_infrastructure_delivery_plan) (Accessed: 3 March 2021).
5. Birmingham City Council (2017) Birmingham Plan 2031: Birmingham Development Plan. Available at: [https://www.birmingham.gov.uk/downloads/file/5433/adopted\\_birmingham\\_development\\_plan\\_2031](https://www.birmingham.gov.uk/downloads/file/5433/adopted_birmingham_development_plan_2031) (Accessed: 3 March 2021).
6. Birmingham City Council (2017) Local Flood Risk Management Strategy for Birmingham. Available at: [https://www.birmingham.gov.uk/downloads/file/2556/local\\_flood\\_risk\\_management\\_strategy](https://www.birmingham.gov.uk/downloads/file/2556/local_flood_risk_management_strategy) (Accessed: 7 March 2021).
7. Birmingham City Council (2020) Birmingham Transport Plan. Available at: [https://www.birmingham.gov.uk/downloads/file/14861/birmingham\\_transport\\_strategy](https://www.birmingham.gov.uk/downloads/file/14861/birmingham_transport_strategy) (Accessed: 25 February 2021).
8. City of Wolverhampton Council, Dudley Metropolitan Borough Council, Sandwell Metropolitan Borough Council, and Walsall Council (2011) Black Country Core Strategy. Available at: <https://blackcountryplan.dudley.gov.uk/t1/p2/> (Accessed: 5 March 2021).
9. City of Wolverhampton Council, Dudley Metropolitan Borough Council, Sandwell Metropolitan Borough Council, and Walsall Council (2016) Local Strategy for Flood Risk Management: The Black Country. Available at: [https://go.walsall.gov.uk/Portals/0/images/importeddocuments/the\\_black\\_country\\_local\\_flood\\_risk\\_management\\_strategy\\_feb\\_2016.pdf](https://go.walsall.gov.uk/Portals/0/images/importeddocuments/the_black_country_local_flood_risk_management_strategy_feb_2016.pdf) (Accessed: 5 March 2021).
10. Coventry City Council (2015) Coventry Local Flood Risk Management Strategy. Available at: [https://www.coventry.gov.uk/downloads/file/19379/coventry\\_local\\_flood\\_risk\\_management\\_strategy](https://www.coventry.gov.uk/downloads/file/19379/coventry_local_flood_risk_management_strategy) (Accessed: 3 March 2021).
11. Coventry City Council (2017) Local Plan. Available at: [https://www.coventry.gov.uk/downloads/file/25899/final\\_local\\_plan\\_december\\_2017](https://www.coventry.gov.uk/downloads/file/25899/final_local_plan_december_2017) (Accessed: 3 March 2021).
12. Coventry City Council (2018) Draft Coventry Connected (Transport and Accessibility): Supplementary Planning Document. Available at: [https://www.coventry.gov.uk/downloads/file/27653/coventry\\_connected\\_spd](https://www.coventry.gov.uk/downloads/file/27653/coventry_connected_spd) (Accessed: 3 March 2021).
13. Coventry City Council (2019) Highway Infrastructure Asset Management Plan. Available at: [https://www.coventry.gov.uk/downloads/file/31525/coventry\\_city\\_council\\_highways\\_infrastructure\\_asset\\_management\\_hiamp\\_2019](https://www.coventry.gov.uk/downloads/file/31525/coventry_city_council_highways_infrastructure_asset_management_hiamp_2019) (Accessed: 3 March 2021).
14. Dudley Metropolitan Borough Council (2016) Transport Asset Management Plan. Available at: <https://www.dudley.gov.uk/residents/parking-and-roads/roads-highways-and-pavements/> (Accessed: 5 March 2021).
15. Dudley Metropolitan Borough Council (2017) Dudley Area Action Plan. Available at: <https://www.dudley.gov.uk/residents/planning/planning-policy/dudley-local-plan/dudley-area-action-plan/> (Accessed: 5 March 2021).
16. Sandwell Metropolitan Borough Council (2018) Highway Infrastructure Asset Management Strategy. Available at: [https://www.sandwell.gov.uk/download/downloads/id/26388/highway\\_infrastructure\\_management\\_strategy\\_2018.pdf](https://www.sandwell.gov.uk/download/downloads/id/26388/highway_infrastructure_management_strategy_2018.pdf) (Accessed: 3 March 2021).
17. Sandwell Metropolitan Borough Council (2019) Winter Service Plan 2019-2020: Highway Services. Available at: <https://cmis.sandwell.gov.uk/cm5/> (Accessed: 2 March 2021).
18. Solihull Metropolitan Borough Council (2013) Solihull Local Plan: Shaping a Sustainable Future. Available at: [https://www.solihull.gov.uk/sites/default/files/migrated/Planning\\_LDF\\_Local\\_Plan\\_Final.pdf](https://www.solihull.gov.uk/sites/default/files/migrated/Planning_LDF_Local_Plan_Final.pdf) (Accessed: 5 March 2021).
19. Solihull Metropolitan Borough Council (2015) Local Flood Risk Management Strategy. Available at: [https://www.solihull.gov.uk/sites/default/files/migrated/CrimeAndEmergencies\\_Final\\_LFRMS.pdf](https://www.solihull.gov.uk/sites/default/files/migrated/CrimeAndEmergencies_Final_LFRMS.pdf) (Accessed: 5 March 2021).
20. Solihull Metropolitan Borough Council (2018) Solihull Council Highway Services: Highway Maintenance Plan 2019. Available at: [https://www.solihull.gov.uk/sites/default/files/migrated/StrategiesPlansPolicies\\_TransportandHighways\\_Highways-Maintenance-Plan.pdf](https://www.solihull.gov.uk/sites/default/files/migrated/StrategiesPlansPolicies_TransportandHighways_Highways-Maintenance-Plan.pdf) (Accessed: 6 March 2021).
21. Solihull Metropolitan Borough Council (2018) Winter Service Plan 2018 / 2023. Available at: [https://www.solihull.gov.uk/sites/default/files/migrated/ParkingTravelRoads\\_Winter\\_Plan.pdf](https://www.solihull.gov.uk/sites/default/files/migrated/ParkingTravelRoads_Winter_Plan.pdf) (Accessed: 7 March 2021).
22. Solihull Metropolitan Borough Council (2020) Solihull Local Plan Review: Draft Infrastructure Delivery Plan. Available at: <https://www.solihull.gov.uk/sites/default/files/2020-12/Draft-Infrastructure-Delivery-Plan-2020.pdf> (Accessed: 7 March 2021).

23. Transport for West Midlands (2011) West Midlands Local Transport Plan. Available at: <https://www.tfwm.org.uk/media/1397/wcce-e8-west-midlands-local-transport-plan-2011-2026.pdf> (Accessed: 3 March 2021).
24. Transport for West Midlands (2018) Congestion Management Plan. Available at: [https://www.tfwm.org.uk/media/3065/tfwm\\_cm-plan-aw\\_v3\\_lr\\_spreads.pdf](https://www.tfwm.org.uk/media/3065/tfwm_cm-plan-aw_v3_lr_spreads.pdf) (Accessed: 25 February 2021).
25. Walsall Council (2015) Winter Service Operational Plan 2015/16 – 2017/18. Available at: <https://go.walsall.gov.uk/Portals/0/Uploads/Transport/Winter%20service%20plan%202015%20to%202018%20web%20version.pdf> (Accessed: 6 March 2021).
26. Walsall Council (2015) Highway Asset Management Plan 2015 – 2021. Available at: [https://go.walsall.gov.uk/Portals/0/images/importedddocuments/walsall\\_hamp\\_vol\\_1\\_v3-1\\_consultation.pdf](https://go.walsall.gov.uk/Portals/0/images/importedddocuments/walsall_hamp_vol_1_v3-1_consultation.pdf) (Accessed: 7 March 2021).
27. Walsall Council (2017) Highway Maintenance Strategy 2015 – 2018. Available at: <https://go.walsall.gov.uk/Portals/0/Uploads/Transport/Highway%20Maint%20Strategy%2015-18%20V1-2.pdf> (Accessed: 7 March 2021).
28. Walsall Council (2017) Transport in Walsall 2017 – 2022. Available at: <https://go.walsall.gov.uk/Portals/0/Uploads/Transport/FINAL%20Transport%20in%20Walsall%20Strategy%202017-2022.pdf> (Accessed: 7 March 2021).
29. Walsall Council (2019) Highway Maintenance Management Plan. Available at: [https://go.walsall.gov.uk/Portals/0/Uploads/PollutionControl/Walsall%20MBC%20HMMP%202018-21v2\\_2.pdf](https://go.walsall.gov.uk/Portals/0/Uploads/PollutionControl/Walsall%20MBC%20HMMP%202018-21v2_2.pdf) (Accessed: 7 March 2021).
30. Walsall Council (2019) Winter Service Operational Plan 2019 – 2022. Available at: <https://go.walsall.gov.uk/Portals/0/Uploads/Transport/Traffic%20Management/Winter%20service%20plan%202019%202022.pdf?ver=2019-11-28-140108-973> (Accessed: 6 March 2021).
31. Walsall Council (2020) Highway Asset Management Strategy. Available at: [https://go.walsall.gov.uk/Portals/0/Uploads/PollutionControl/HAMS2020\\_V1\\_3.pdf?ver=2020-07-08-133713-687](https://go.walsall.gov.uk/Portals/0/Uploads/PollutionControl/HAMS2020_V1_3.pdf?ver=2020-07-08-133713-687) (Accessed: 8 March 2021).
32. West Midlands Combined Authority (2016) Movement For Growth: The West Midlands Strategic Transport Plan. Available at: <https://www.tfwm.org.uk/media/1099/movement-for-growth.pdf> (Accessed: 25 February 2021).
33. West Midlands Combined Authority (2017) Movement for Growth: 2026 Delivery Plan for Transport. Available at: <https://www.tfwm.org.uk/media/2539/2026-delivery-plan-for-transport.pdf> (Accessed: 25 February 2021).

**Table S1.** Policy Document Key.

| <b>Key</b> | <b>Policy documents</b>                                                       |
|------------|-------------------------------------------------------------------------------|
| <b>A</b>   | Black Country - Local Strategy for Flood Risk Management 2016                 |
| <b>B</b>   | Solihull MBC - Local Flood Risk Management Strategy 2015                      |
| <b>C</b>   | Coventry CC - Local Flood Risk Management Strategy 2015                       |
| <b>D</b>   | Birmingham CC - Birmingham Mobility Action Plan Green Paper 2013              |
| <b>E</b>   | Birmingham CC - Infrastructure Delivery Plan 2014                             |
| <b>F</b>   | Sandwell MBC - Winter Service Plan 2019-20                                    |
| <b>G</b>   | TfWM - West Midlands Local Transport Plan 2011-26                             |
| <b>H</b>   | Birmingham CC - Birmingham Mobility Action Plan White Paper 2014              |
| <b>I</b>   | Birmingham CC - Local Flood Risk Management Strategy for<br>Birmingham 2017   |
| <b>J</b>   | WMCA Movement for Growth - 2026 Delivery Plan for Transport                   |
| <b>K</b>   | Solihull MBC - Solihull Local Plan: Shaping a Sustainable Future 2013         |
| <b>L</b>   | Solihull MBC - Winter Plan 2018-23                                            |
| <b>M</b>   | Walsall Council - Highway Asset Management Plan 2015-2021                     |
| <b>N</b>   | Walsall Council - Highway Maintenance Strategy 2015-18                        |
| <b>O</b>   | WMCA Movement for Growth - The West Midlands Strategic Transport<br>Plan 2016 |
| <b>P</b>   | Birmingham CC - Birmingham Plan 2031: Birmingham Development<br>Plan          |
| <b>Q</b>   | Coventry CC - Highway Infrastructure Asset Management Plan 2019               |
| <b>R</b>   | Solihull MBC - Draft Infrastructure Delivery Plan 2020                        |
| <b>S</b>   | Birmingham CC - Birmingham Transport Plan 2020                                |
| <b>T</b>   | Coventry CC - Local Plan 2017                                                 |
| <b>U</b>   | TfWM - Congestion Management Plan 2018                                        |
| <b>V</b>   | Walsall Council - Highway Asset Management Strategy 2020                      |
| <b>W</b>   | Black Country - Core Strategy 2011                                            |
| <b>X</b>   | Dudley MBC - Dudley Area Action Plan 2017                                     |
| <b>Y</b>   | Birmingham CC - Birmingham Sustainable Community Strategy 2026                |
| <b>Z</b>   | Dudley MBC - Transport Asset Management Plan 2016                             |
| <b>AA</b>  | Walsall Council - Highway Maintenance Management Plan 2019                    |
| <b>AB</b>  | Walsall Council - Winter Service Operational Plan 2015-18                     |
| <b>AC</b>  | Walsall Council - Winter Service Operational Plan 2019-2022                   |
| <b>AD</b>  | Sandwell MBC - Highway Infrastructure Asset Management Strategy<br>2018       |
| <b>AE</b>  | Solihull Council Highway Services - Highway Maintenance Plan 2019             |
| <b>AF</b>  | Walsall Council - Transport in Walsall Strategy 2017-2022                     |
| <b>AG</b>  | Coventry CC - Coventry Connected (Transport and Accessibility) 2018           |
| <b>AH</b>  | Birmingham CC - Winter Service Plan                                           |
| <b>AI</b>  | Coventry CC - Winter Service Plan                                             |

| Policy document key | Roles and responsibilities | Regularly reviewed | Cost-benefit appraisal | Accessibility | Communication with road users | Collaboration | Flexibility | Inter-dependencies | Total |
|---------------------|----------------------------|--------------------|------------------------|---------------|-------------------------------|---------------|-------------|--------------------|-------|
| A                   | 5                          | 5                  | 4                      | 5             | 5                             | 5             | 2           | 4                  | 35    |
| B                   | 5                          | 5                  | 4                      | 5             | 4                             | 5             | 3           | 3                  | 34    |
| C                   | 5                          | 5                  | 4                      | 5             | 4                             | 5             | 2           | 3                  | 33    |
| D                   | 3                          | 5                  | 3                      | 5             | 4                             | 5             | 5           | 1                  | 31    |
| E                   | 5                          | 4                  | 4                      | 5             | 1                             | 5             | 4           | 2                  | 30    |
| F                   | 5                          | 3                  | 4                      | 2             | 5                             | 5             | 4           | 2                  | 30    |
| G                   | 3                          | 5                  | 3                      | 5             | 3                             | 5             | 4           | 2                  | 30    |
| H                   | 2                          | 5                  | 2                      | 5             | 3                             | 5             | 5           | 2                  | 29    |
| I                   | 5                          | 4                  | 4                      | 5             | 2                             | 5             | 2           | 2                  | 29    |
| J                   | 2                          | 5                  | 3                      | 5             | 2                             | 5             | 5           | 1                  | 28    |
| K                   | 3                          | 5                  | 3                      | 5             | 1                             | 5             | 4           | 1                  | 27    |
| L                   | 4                          | 5                  | 2                      | 4             | 4                             | 4             | 3           | 1                  | 27    |
| M                   | 2                          | 5                  | 4                      | 5             | 3                             | 5             | 2           | 1                  | 27    |
| N                   | 3                          | 5                  | 4                      | 5             | 2                             | 5             | 1           | 2                  | 27    |
| O                   | 2                          | 4                  | 3                      | 5             | 1                             | 5             | 5           | 2                  | 27    |
| P                   | 3                          | 3                  | 3                      | 5             | 3                             | 5             | 4           | 1                  | 27    |
| Q                   | 3                          | 5                  | 4                      | 5             | 2                             | 5             | 2           | 1                  | 27    |
| R                   | 5                          | 4                  | 4                      | 2             | 1                             | 5             | 5           | 1                  | 27    |
| S                   | 4                          | 1                  | 2                      | 5             | 3                             | 5             | 5           | 1                  | 26    |
| T                   | 2                          | 5                  | 3                      | 5             | 1                             | 5             | 4           | 1                  | 26    |
| U                   | 2                          | 4                  | 2                      | 4             | 4                             | 5             | 4           | 1                  | 26    |
| V                   | 5                          | 5                  | 4                      | 5             | 2                             | 3             | 1           | 1                  | 26    |
| W                   | 2                          | 5                  | 2                      | 5             | 1                             | 5             | 4           | 1                  | 25    |
| X                   | 3                          | 3                  | 2                      | 5             | 1                             | 5             | 4           | 1                  | 24    |
| Y                   | 2                          | 4                  | 2                      | 5             | 1                             | 5             | 3           | 1                  | 23    |
| Z                   | 4                          | 3                  | 2                      | 5             | 1                             | 5             | 2           | 1                  | 23    |
| AA                  | 3                          | 3                  | 2                      | 5             | 4                             | 3             | 2           | 1                  | 23    |
| AB                  | 4                          | 1                  | 1                      | 5             | 5                             | 4             | 2           | 1                  | 23    |
| AC                  | 4                          | 1                  | 1                      | 5             | 5                             | 4             | 2           | 1                  | 23    |
| AD                  | 3                          | 5                  | 2                      | 5             | 2                             | 3             | 1           | 1                  | 22    |
| AE                  | 2                          | 4                  | 2                      | 2             | 4                             | 5             | 2           | 1                  | 22    |
| AF                  | 4                          | 1                  | 2                      | 5             | 1                             | 5             | 3           | 1                  | 22    |
| AG                  | 2                          | 1                  | 2                      | 5             | 1                             | 4             | 4           | 1                  | 20    |
| AH                  |                            |                    |                        | 1             |                               |               |             |                    | 1     |
| AI                  |                            |                    |                        | 1             |                               |               |             |                    | 1     |
